# Supplementary material
Source: publisher figshare collection journal article supplement (https://diabetesjournals.figshare.com/articles/dataset/_/17209328)

**Supplemental Figures:**

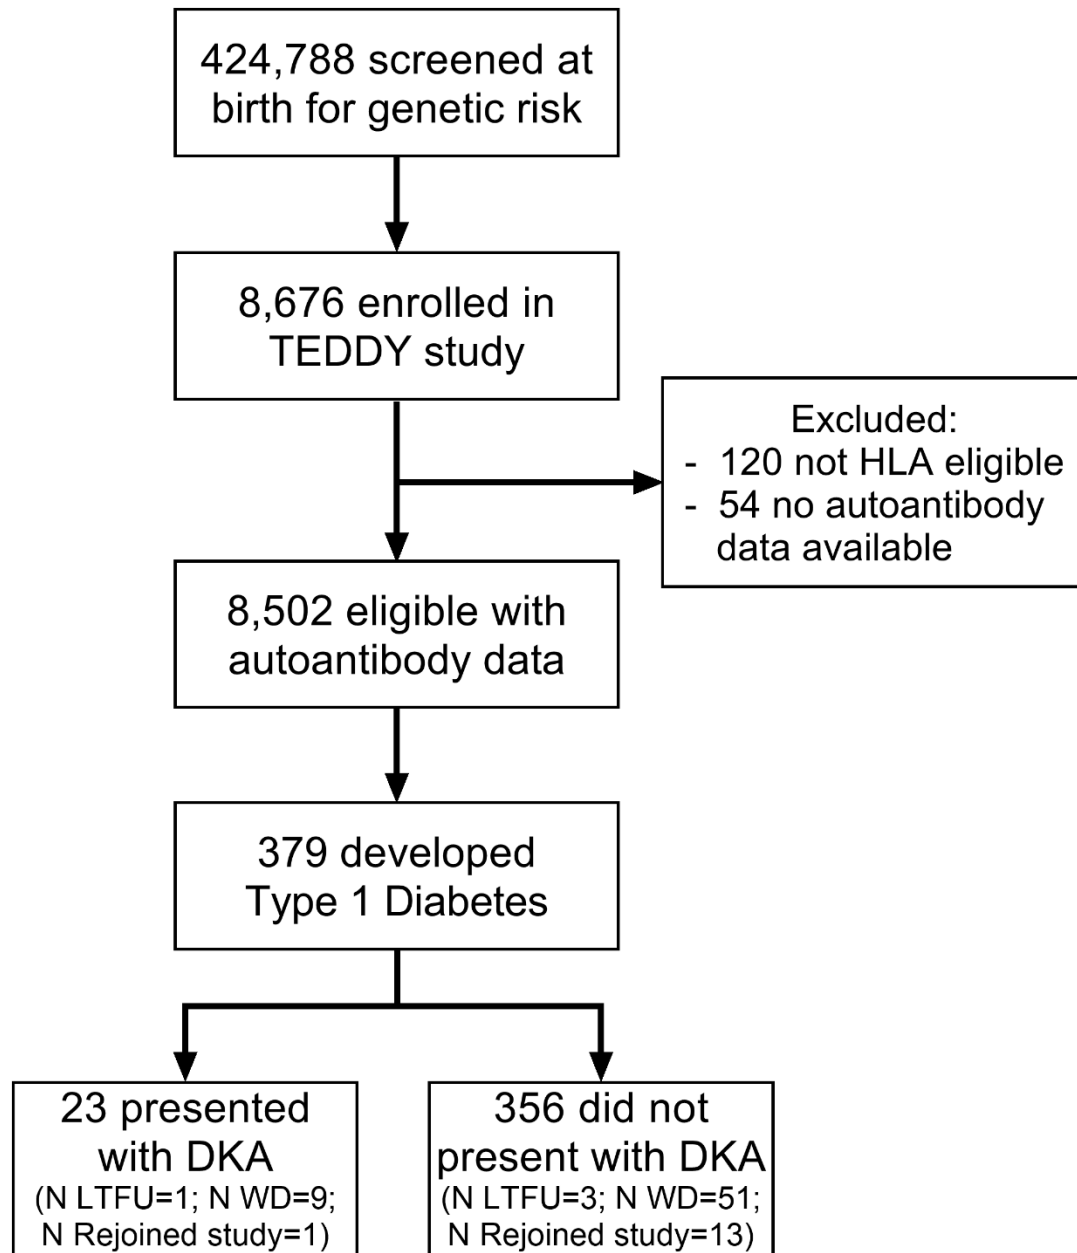

Supplemental Figure 1: Flowchart of subjects with type 1 diabetes included in analysis from TEDDY cohort.

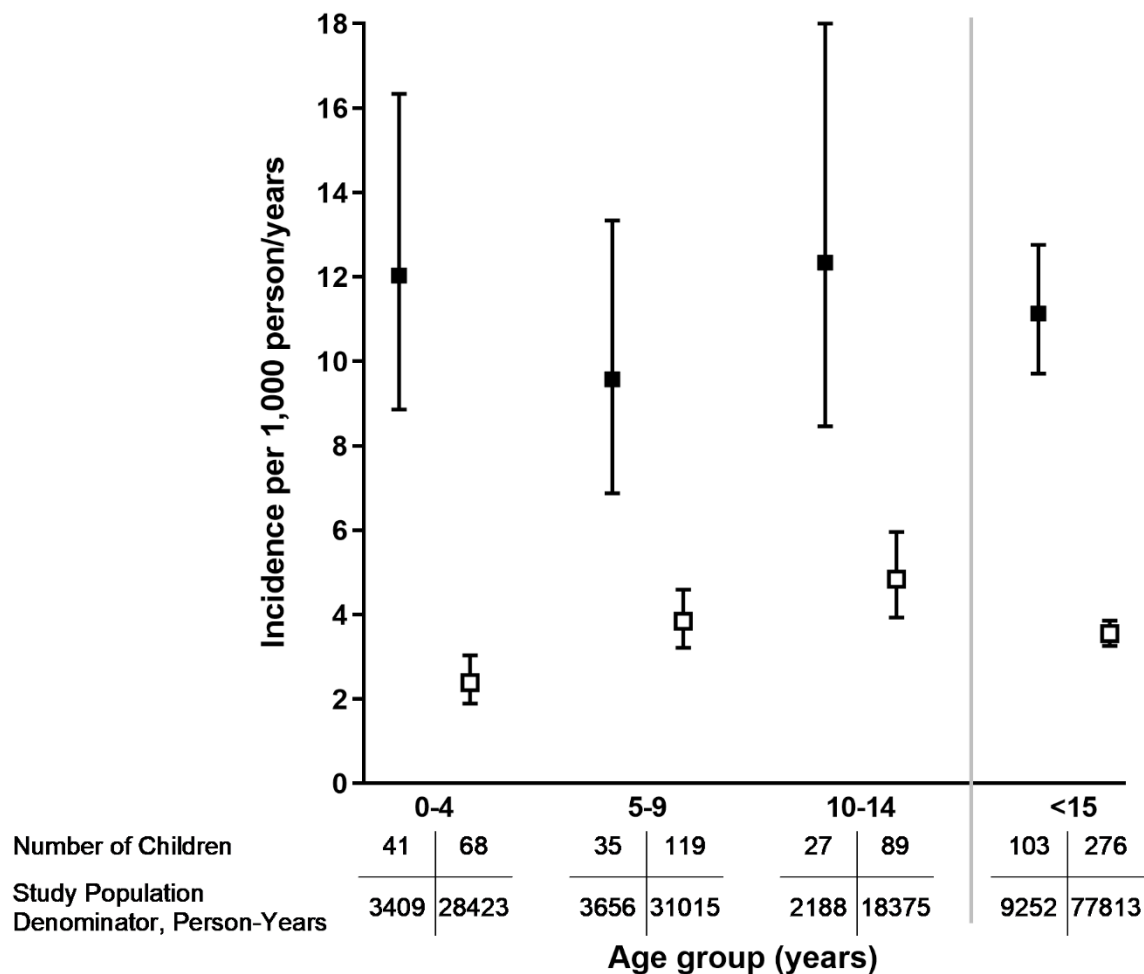

Supplemental Figure 2: Incidence of type 1 diabetes in TEDDY children with a first-degree relative (FDR) (closed boxes) and without a FDR (open boxes) for each age group in cases per 1,000 person-years with 95% confidence intervals. The number of children per group in the analysis is shown below the figure. The incidence rate of type 1 diabetes of FDRs as compared to those without a family history was higher across all age groups ( $p < 0.001$ ).

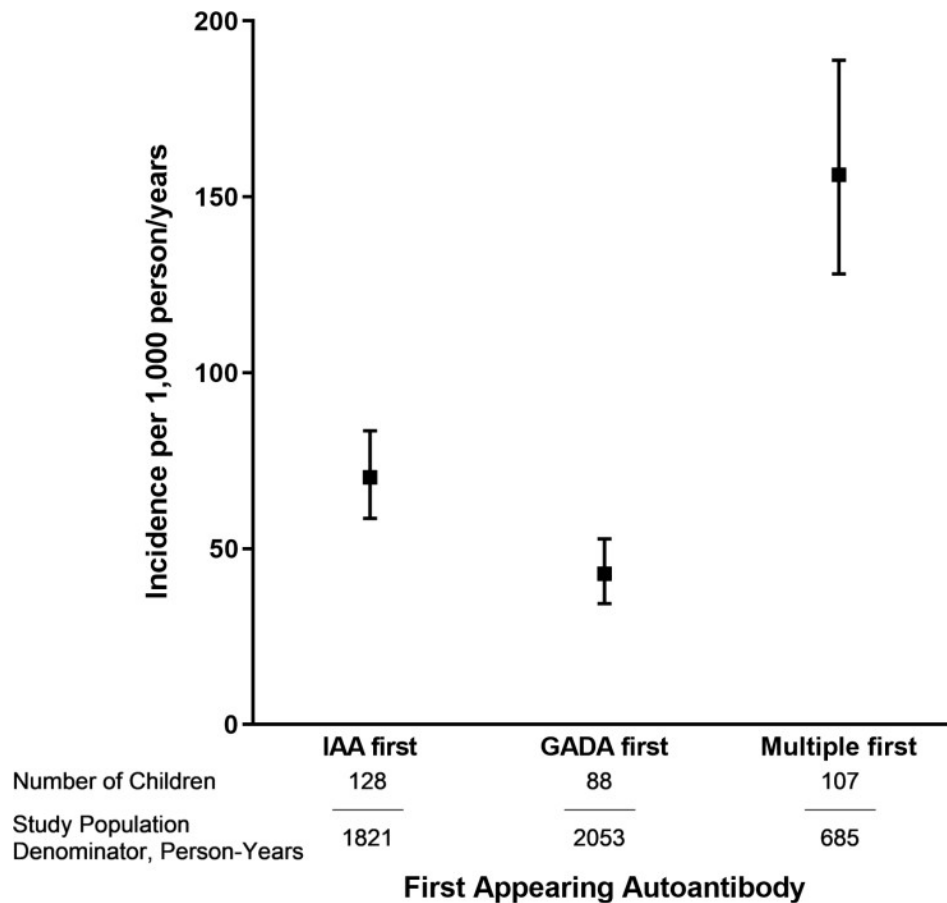

Supplemental Figure 3: Incidence of type 1 diabetes in TEDDY children by first appearing autoantibody in cases per 1,000 person-years with 95% confidence intervals. Number of children and study population denominator (those with at least one confirmed persistent autoantibody) displayed below each group. Significance between groups: GADA first vs IAA first,  $p=0.31$ ; multiple autoantibodies first vs IAA first,  $p<0.001$ ; multiple autoantibodies vs GADA first,  $p<0.001$ .

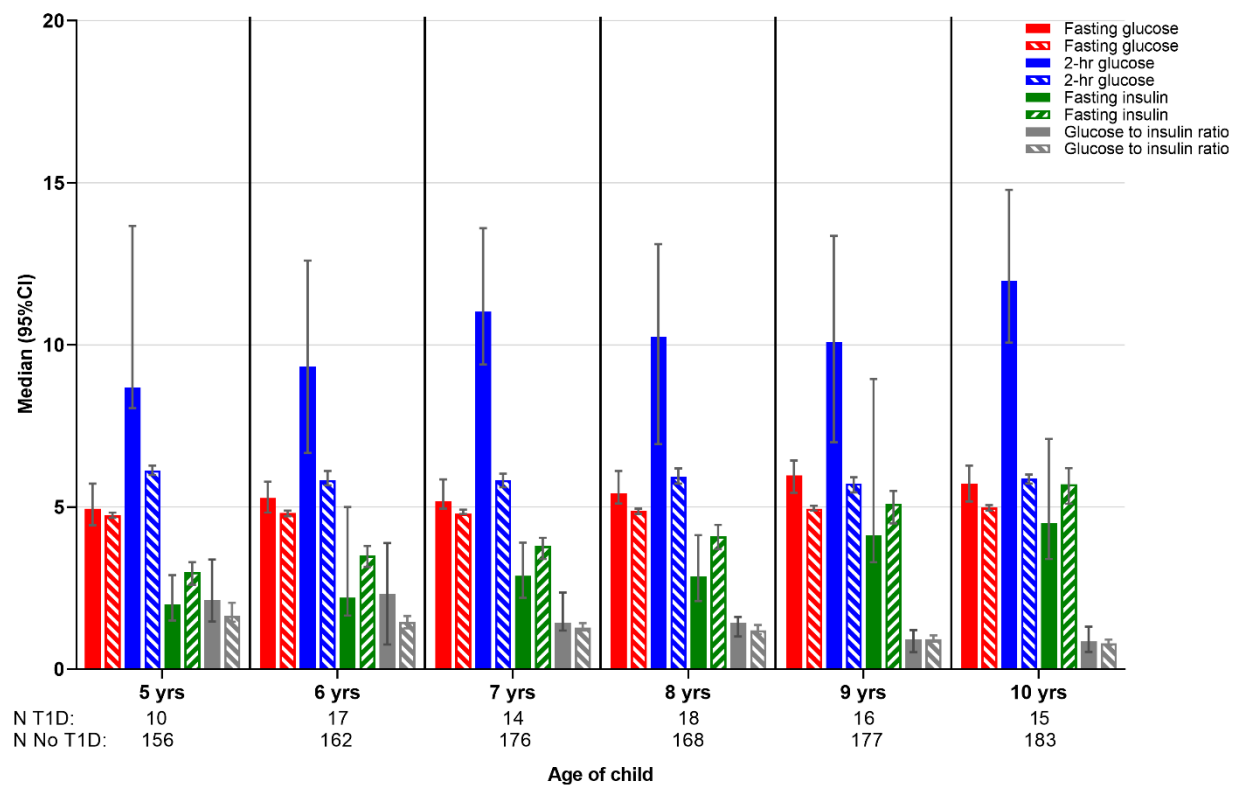

Supplement: Supplementary file 1 [file 1]
